# Supplementary material for: A nomogram combining long non-coding RNA expression profiles and clinical factors predicts survival in patients with bladder cancer
Source: Aging (Albany NY). 2020 Feb 12;12(3):2857–79. doi: 10.18632/aging.102782 (PMC7041749; doi:10.18632/aging.102782)
Supplement: Supplementary Figures [file aging-12-102782-s003..pdf]

## SUPPLEMENTARY FIGURES

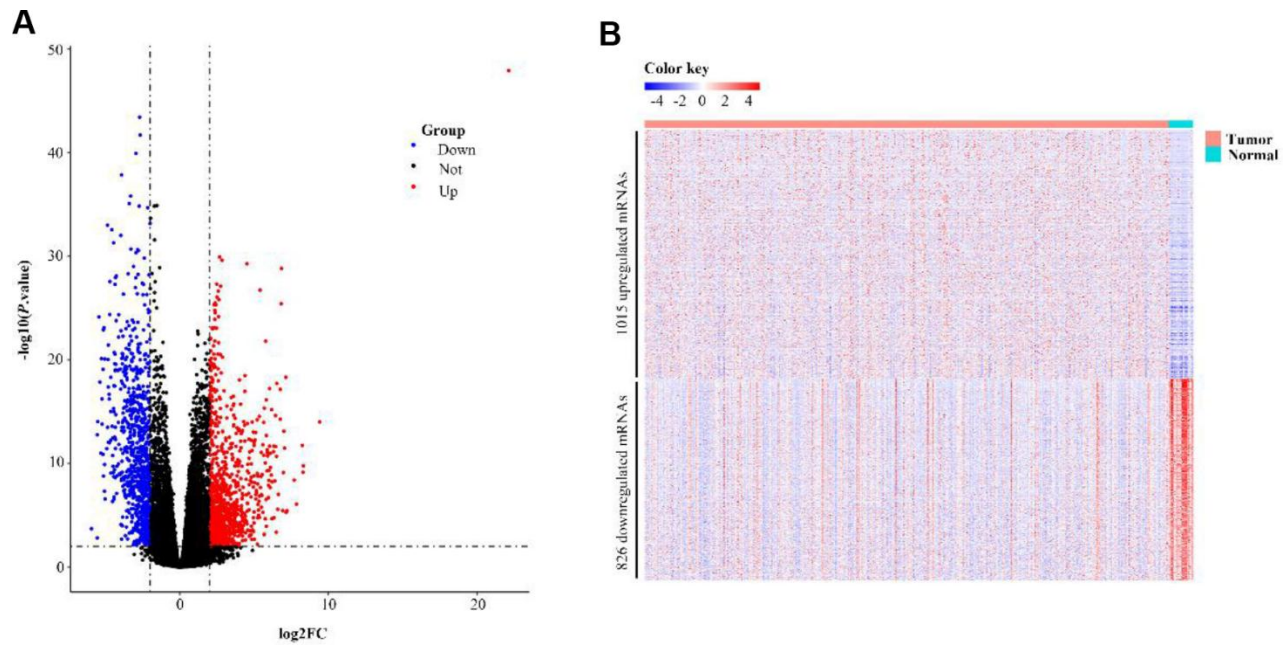

**Supplementary Figure 1. Volcano plot and heatmap of 1841 mRNAs in bladder cancer patients from TCGA-BLCA Project. (A)** Volcano plot of 1841 mRNAs in bladder cancer samples from TCGA-BLCA Project. **(B)** Heatmap of 1841 mRNAs in bladder cancer samples from TCGA-BLCA Project. Blue indicates downregulated mRNAs, and red represents upregulated mRNAs.

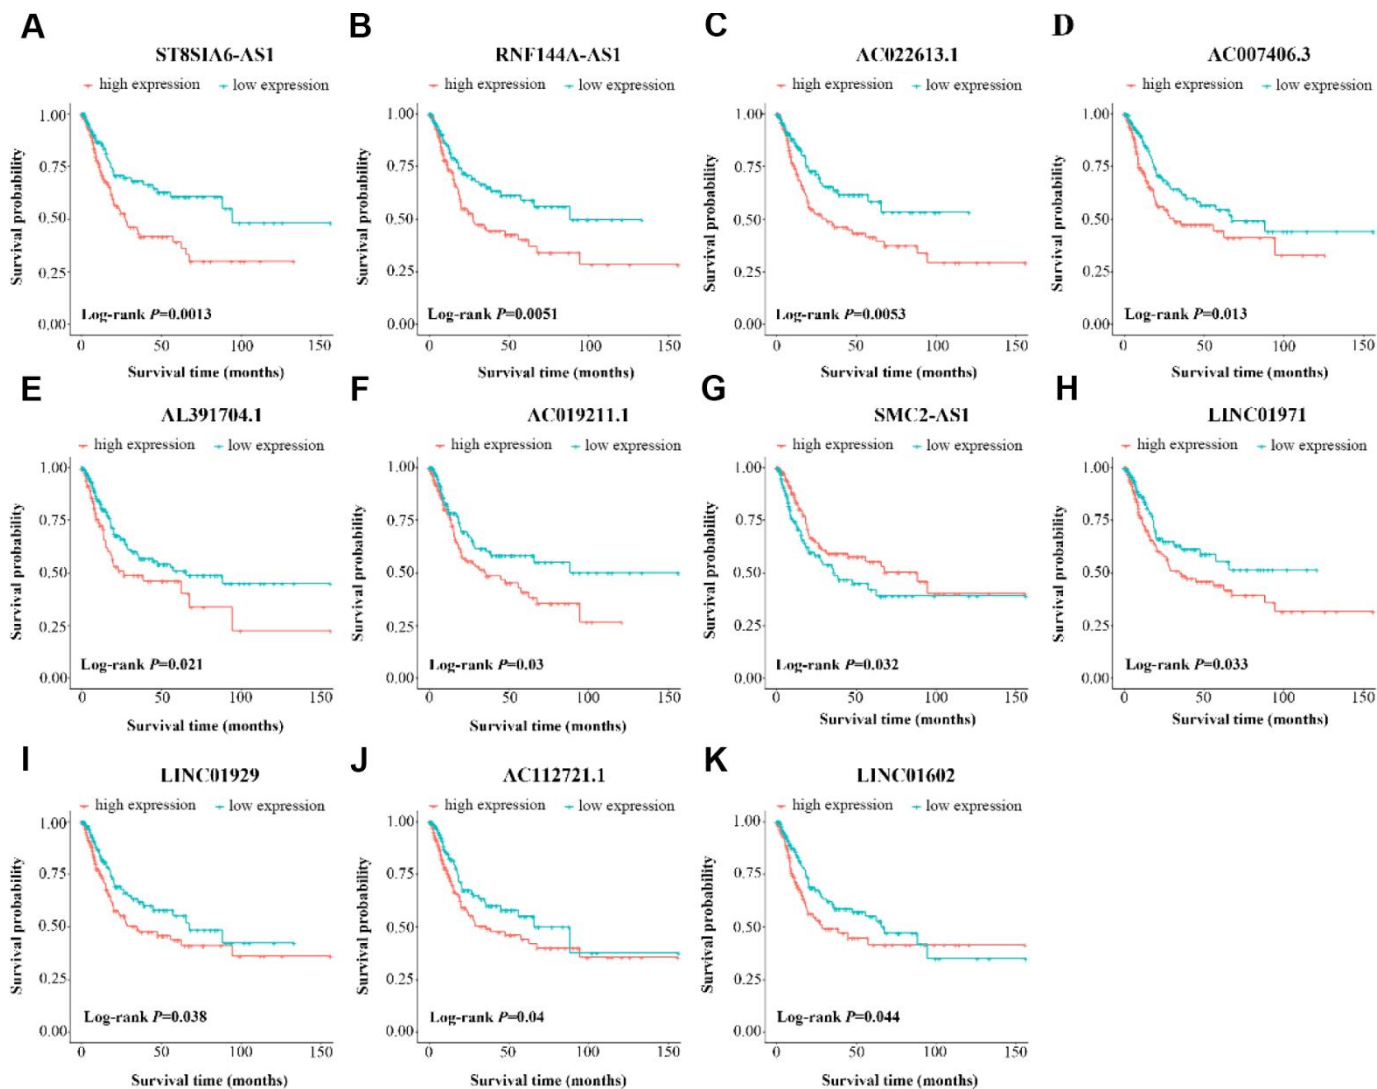

**Supplementary Figure 2.** Kaplan-Meier curves of OS for 410 bladder cancer patients based on the expression of candidate OS-related lncRNAs. (A) ST8SIA6-AS1. (B) NF144A-AS1. (C) AC022613.1. (D) AC007406.3. (E) AL391704.1. (F) AC019211.1. (G) SMC2-AS1. (H) LINC01971. (I) LINC01929. (J) AC112721.1. (K) LINC01602.

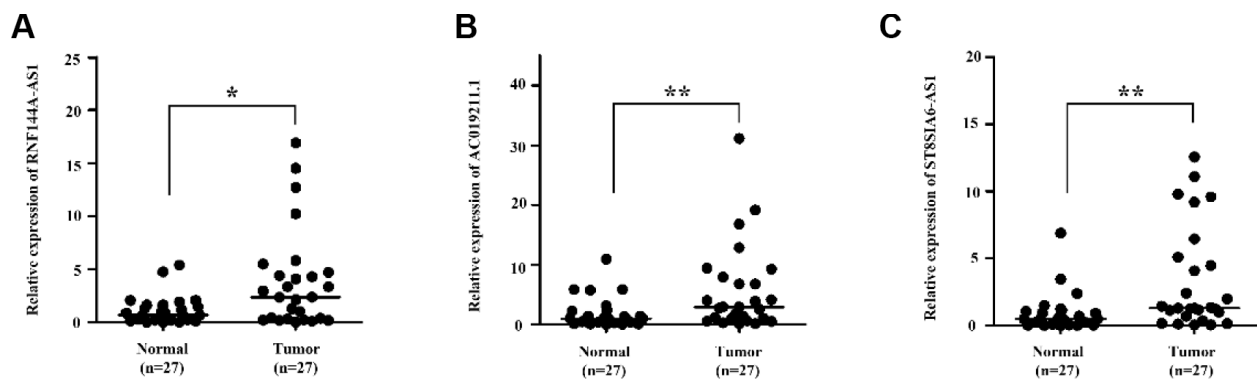

**Supplementary Figure 3.** The expression of RNF144A-AS1 (A), AC019211.1 (B) and ST8SIA6-AS1 (C) in 27 bladder cancer tissues and 27 normal bladder tissues.
